# Supplementary material
Source: Elsevier journal article supplement (https://cris.unibo.it/retrieve/handle/11585/1010274/bd532e28-a970-490f-88ee-3417b03eaa39/mmc1.docx)
Supplement: mmc1 [file mmc1.docx]

**Supplementary Table 1** Responders and seizure-free rates in the children/adolescents and adults.

|  |  | **Children/adolescents (n=21)** | |  | **Adults (n=35)** | |  |
| --- | --- | --- | --- | --- | --- | --- | --- |
| **Outcome** |  | Yes | No |  | Yes | No | *p* |
|  |  | N° (%) | N° (%) |  | N° (%) | N° (%) |  |
| Responders |  |  |  |  |  |  |  |
| *3 months* |  | 8 (66,6) | 4 (33,3) |  | 18 (66,6) | 9 (33,3) | 1.00 |
| *6 months* |  | 9 (75) | 3 (25) |  | 20 (91) | 2 (9) | 0.319 |
| *12 months* |  | 9 (69,2) | 4 (30,7) |  | 17 (94,4) | 1 (5,6) | 0.134 |
| *Last visit* |  | 14 (66,6) | 7 (33,3) |  | 30 (85.7) | 5 (14.3) | 0.118 |
| Seizure-free |  |  |  |  |  |  |  |
| *3 months* |  | 5 (41,6) | 7 (58,3) |  | 15 (55,5) | 12 (44,4) | 0.501 |
| *6 months* |  | 5 (41,6) | 7 (58,3) |  | 15 (68,2) | 7 (31,8) | 0.163 |
| *12 months* |  | 3 (23,1) | 10 (76,9) |  | 13 (72,2) | 5 (27,8) | **0.011** |
| *Last visit* |  | 7 (33,3) | 14 (66,6) |  | 23 (65,7) | 12 (34,3) | **0.027** |

In bold: significantly different.

**Supplementary Table 2** Cox regression analysis of drug discontinuation.

|  | | **HR** | **95% C.I.** | ***p* value** |
| --- | --- | --- | --- | --- |
| Age | | 1.01 | 0.97 - 1.05 | *0.600* |
| Sex (F) | | 1.57 | 0.25 - 9.74 | *0.628* |
| Early add-on | | 1.88 | 0.36 - 9.85 | *0.455* |
| Concomitant ASM mechanism of action (reference: SB) | |  |  |  |
|  | GABA agonist | 0.00 | 0.00 - n.e. | *1.000* |
|  | SV2A ligand | 3.70 | 0.53 - 25.93 | *0.187* |
|  | Others | 2.02 | 0.25 - 16.47 | *0.510* |
| Concomitant EiASM | | 0.02 | 0.00 - 0.65 | ***0.028*** |
| Adverse events (presence) | | 9.91 | 1.52 - 64.56 | ***0.016*** |
| Seizure reduction at last visit (reference: seizure free) | |  |  |  |
|  | Responder | 0.55 | 0.07 - 4.53 | *0.581* |
|  | < 50% reduction in seizure frequency | 2.44 | 0.25 - 23.60 | *0.442* |
|  | Unchanged/Worsened frequency | 36.97 | 2.21 - 618.81 | ***0.012*** |

In bold: significantly different. GABA: gamma-amino-butyrric acid; EiASM: enzyme-inducing antiseizure medication; HR: Hazard Ratio; n.e.: not estimable; SB: sodium blocker; SV2A: synaptic vesicle 2A.

**Supplementary table 3** Binomial logistic regression analysis of adverse events occurrence within 12 months.

|  | | **OR** | **95% C.I.** | ***p* value** |
| --- | --- | --- | --- | --- |
| Age | | 1.04 | 1.01 - 1.07 | ***0.011*** |
| Sex (F) | | 0.89 | 0.24 - 9.34 | *0.858* |
| Early add-on | | 2.44 | 0.64 -9.34 | *0.194* |
| Concomitant ASM mechanism of action (reference: SB) | |  |  |  |
|  | GABA agonist | 1.00 | n.e - n.e. | *n.e.* |
|  | SV2A ligand | 0.27 | 0.04 - 1.64 | *0.154* |
|  | Others | 0.65 | 0.13 - 3.20 | *0.593* |
| Concomitant EiASM | | 2.88 | 0.44 - 18.22 | *0.270* |

In bold: significantly different. GABA: gamma-amino-butyrric acid; EiASM: enzyme-inducing antiseizure medication; n.e.: not estimable; OR: Odds Ratio; SB: sodium blocker; SV2A: synaptic vesicle 2A.

**Supplementary table 4** Ordered logistic regression analysis of perampanel-efficacy.

|  | | **OR** | **95% C.I.** | ***p* value** |
| --- | --- | --- | --- | --- |
| Age | | 0.97 | 0.95 - 1.00 | ***0.034*** |
| Sex (F) | | 1.99 | 0.64 - 6.16 | *0.234* |
| Early add-on | | 0.84 | 0.27 - 2.58 | *0.759* |
| Concomitant ASM mechanism of action (reference: SB) | |  |  |  |
|  | GABA agonist | 0.00 | 0 - n.e. | *0.993* |
|  | SV2A ligand | 0.46 | 0.11 - 1.92 | *0.287* |
|  | Others | 0.36 | 0.10 - 1.36 | *0.132* |
| Concomitant EiASM | | 0.55 | 0.10 - 3.08 | *0.499* |

Outcome ordered as decreasing efficacy: 0 "seizure-free"; 1 "responder"; 2 "< 50% reduction in seizure frequency "; 3 " Unchanged/Worsened frequency". In bold: significantly different. GABA: gamma-amino-butyrric acid; EiASM: enzyme-inducing antiseizure medication; n.e.: not estimable; OR: Odds Ratio; SB: sodium blocker; SV2A: synaptic vesicle 2A.
